# Supplementary material
Source: PubMed Central journal article supplement (PMC3813866)
Supplement: supp_113.156224_156224SI.pdf [file supp_113.156224_156224SI.pdf]

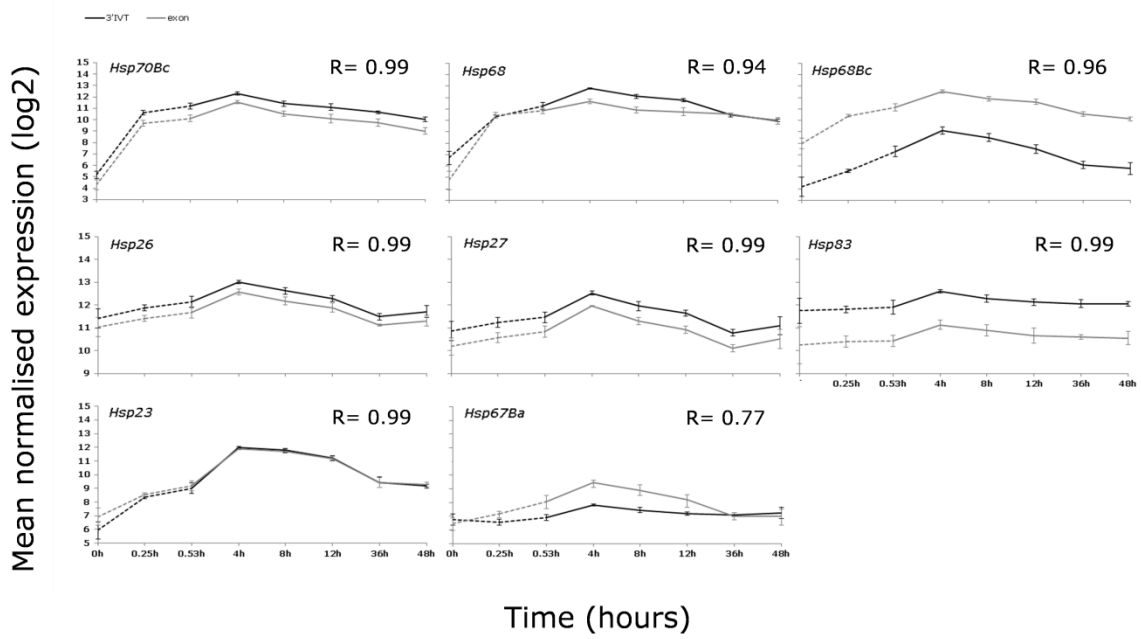

**Figure S1** High signal comparability of the 3'IVT (black line) and exon modules (grey line) for eight thermally responsive *Hsps*. Dashed lines indicate thermal stress at 38.5°C, solid lines indicate recovery up to 48 hours post stress at 25°C. Signals are shown as average normalized expression on the Y-axis. Pearson's *R* is shown in the right hand corner of each graph.

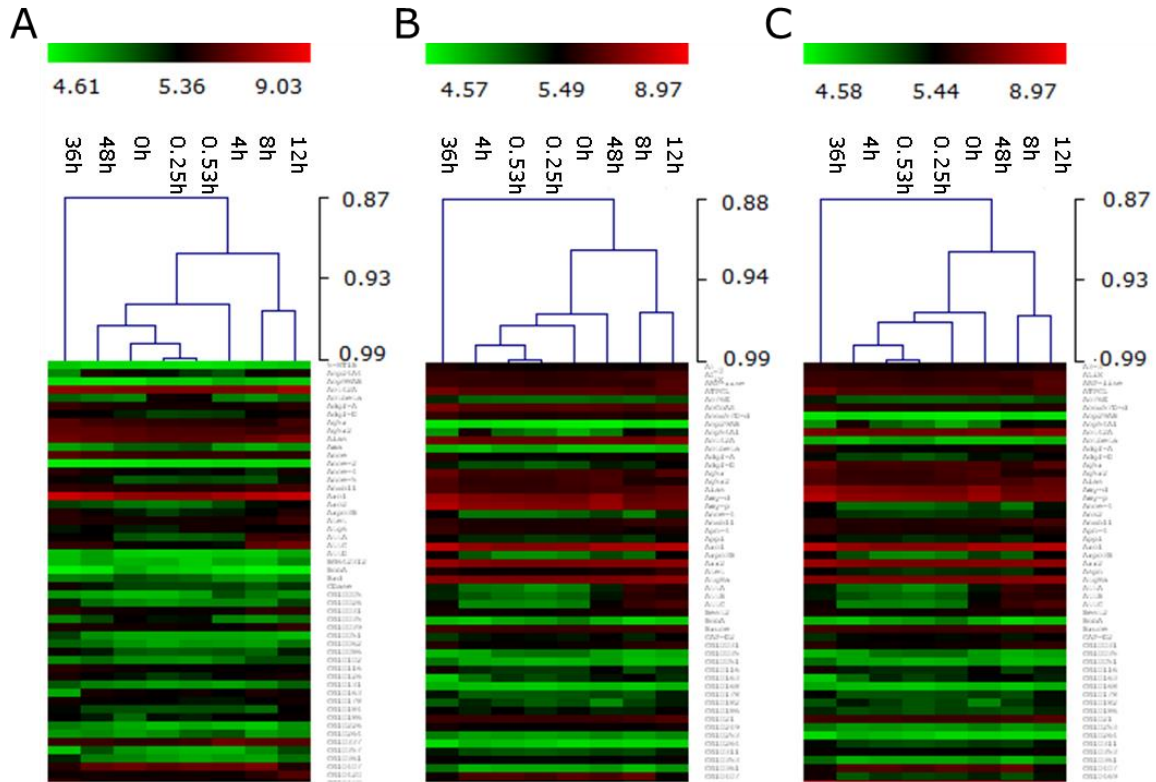

**Figure S2 Average linkage hierarchical clustering of the eight point time-series across three replicates for the significant time-point term (FDR 0.2).** A) 3'IVT module ( $n=1114$  genes), B) constitutive probes from the exon module ( $n=1282$  genes), and C) for all probes in the exon module ( $n=1171$  genes). Similar temporal expression patterns are seen between the module and probe comparisons where the stress and early recovery period cluster closely together and are grouped with time zero and 48 hours recovery. The transcriptional response to thermal stress appears closer to basal levels by 48 hours post stress.

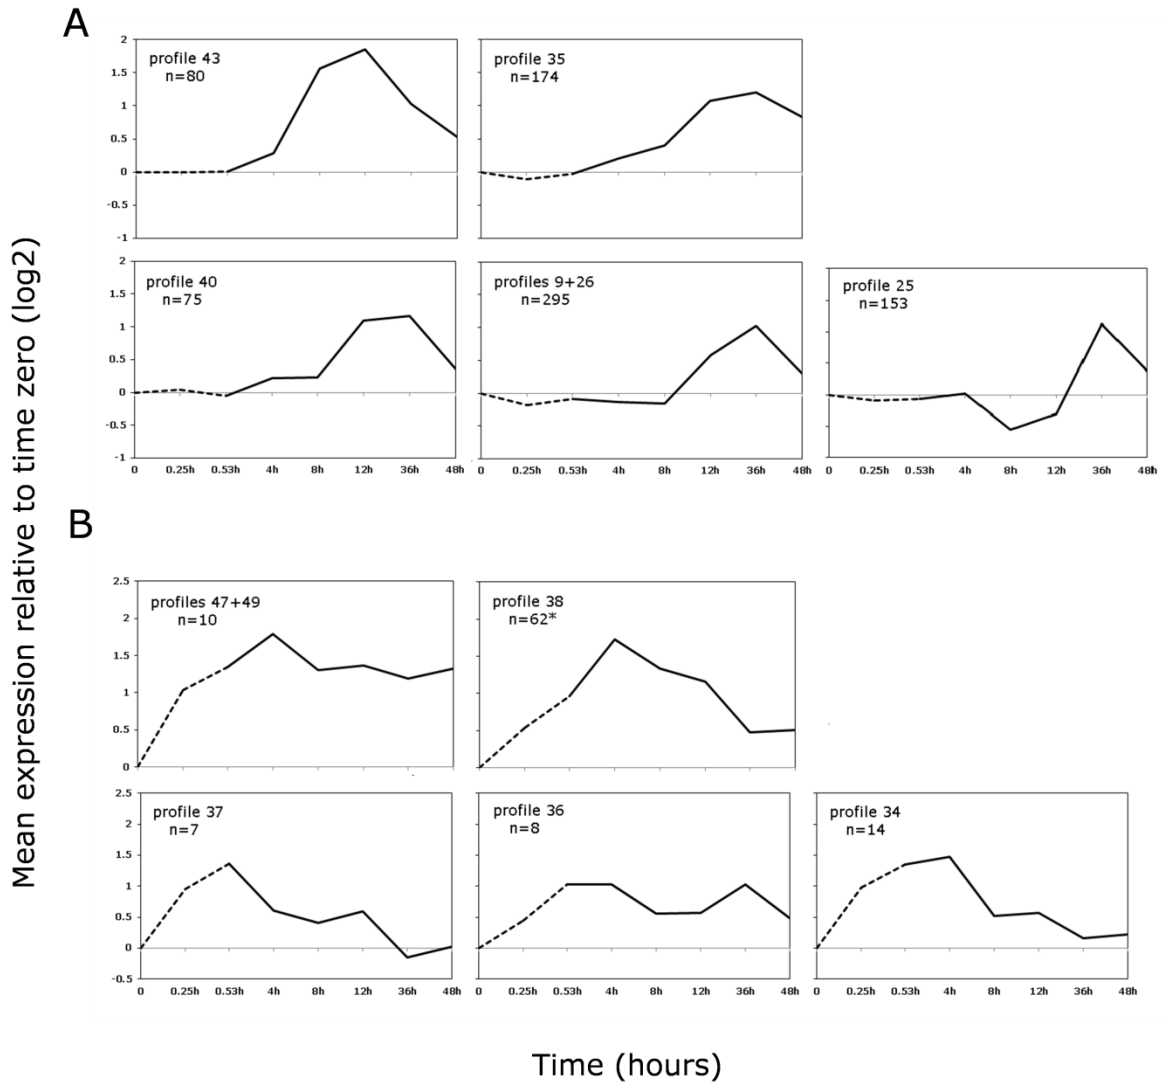

**Figure S3 Short time-series expression miner (STEM) profiles of 1078 genes identified from the 3'IVT probe module with ANOVA.** Average normalized (relative to time zero) signals of each profile/profile cluster are shown on the Y-axis, time in hours is shown on the X-axis. The dashed line indicates thermal stress sampled at 15 and 31.5 minutes at 38.5°, solid line indicates recovery up to 48 hours post stress at 25°. (A) Profiles enriched for mid-late recovery expressed genes with peak expression at 12 or 36 hours. Rapidly heat responsive genes (B) are under enriched with peak at either at late stress/early recovery.

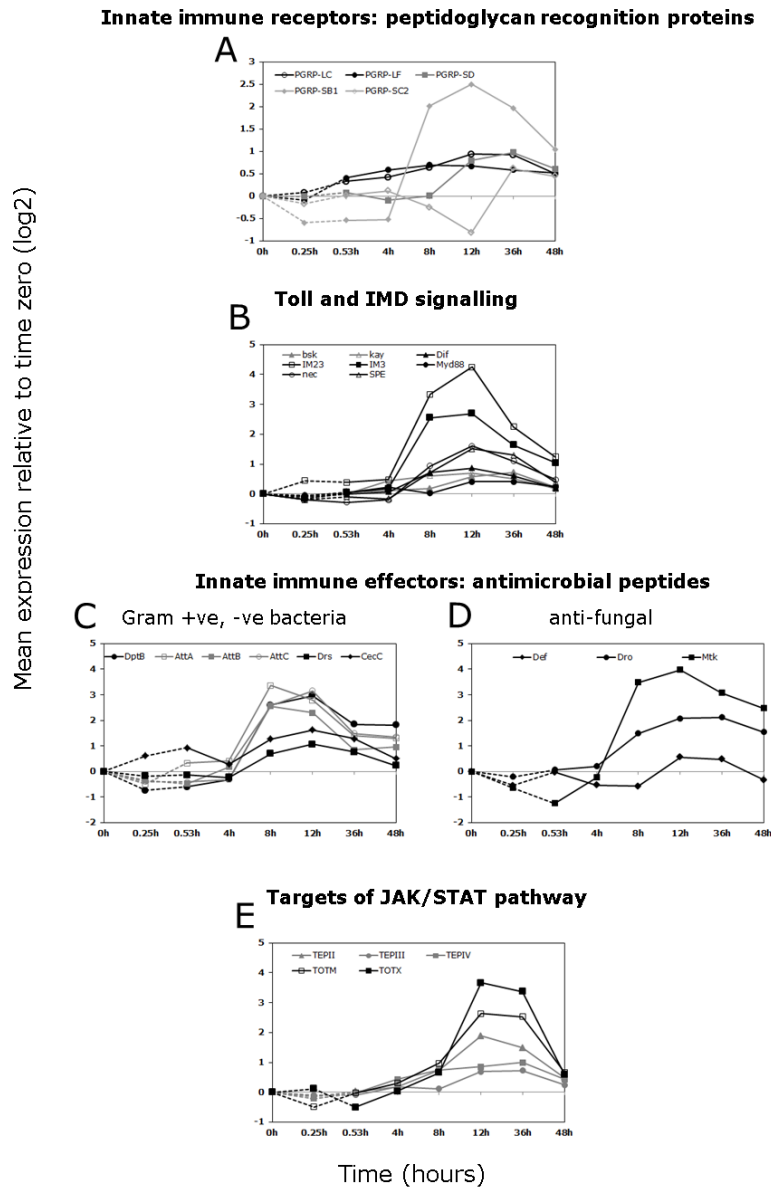

**Figure S4 Up-regulation of genes spanning the repertoire of *Drosophila* innate immune response.** Dashed lines indicate thermal stress at 38.5<sup>o</sup>, solid lines indicate recovery up to 48 hours post stress at 25<sup>o</sup>. Exon profiles from the microarray analyses (constitutive exon set) are shown as average normalized expression relative to time zero on the Y-axis (log<sub>2</sub>). A) Expression profiles of the PGRPs that activate the immune pathways to regulate the expression of antimicrobial peptides; PGRP-LC and LF (black circles) are required to activate the IMD pathway, PGRP-SD (dark grey squares) is required to activate the Toll pathway, other non-activating PGRPs SB1 and SC2 (light grey triangles). B) IMD (grey) and Toll (black) signaling components. C) Bacterial (gram -ve (IMD) and +ve (Toll)) and D) fungal (Toll) AMPs activated by the humoral immune pathways. E) AMPs and other genes regulated by the JAK/STAT pathway (IMD).

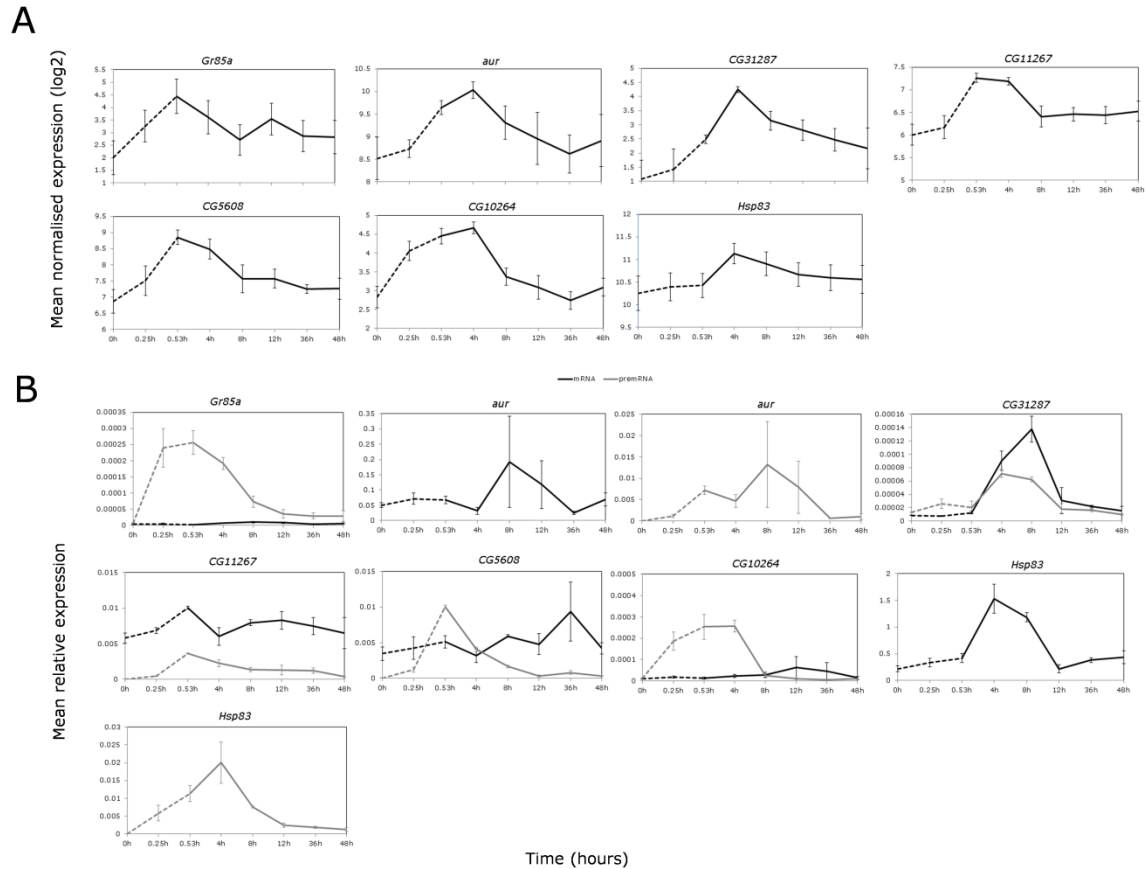

**Figure S5 Detailed transcript analyses of early responding genes confirm RNA splicing inhibition during heat shock.** Dashed lines indicate thermal stress at 38.5°, solid lines indicate recovery up to 48 hours post stress at 25°. Exon profiles from the microarray analyses (constitutive exon set), shown as average normalized expression on the Y-axis (log<sub>2</sub>). B) Real-time PCR profiling using exon-junction primers to target mature mRNA levels (black line) and intron/exon primers to target pre-mRNA levels (grey line) relative to *RpL11* (Y-axis). Negligible *Gr85a* and *CG10264* mRNA suggests that these genes may be transcriptionally active during heat shock. *Hsp83* is shown in the last panels of A and B to confirm nascent transcript accumulation during heat stress. Error bars are the ± SE of the mean.

Mean relative expression

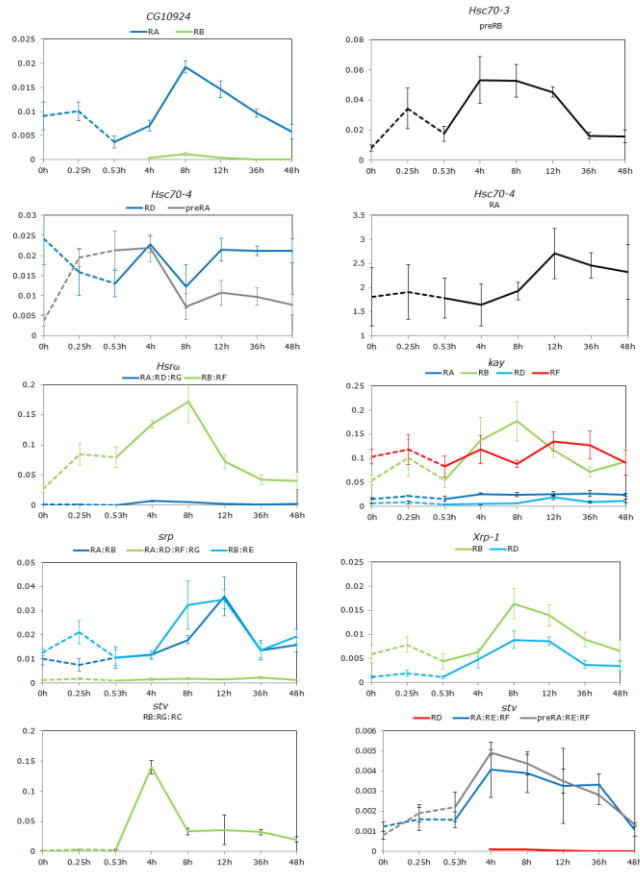

Time (hours)

**Figure S6** Raw data for PCR data for multi-transcript genes using exon-junction primers to target mature mRNA levels and intron/exon primers to target pre-mRNA levels relative to *RpL11* (Y-axis). Error bars are the  $\pm$  SE of the mean.

## File S1

### Supplementary results

Array hybridization quality was evaluated for individual probe signals by examining kernel density distributions across modules and detection above background (DABG) within modules. Similar kernel density distributions were observed for all hybridizations, although the signal intensities for time-point zero, replicate one were slightly dimmer. This was reflected in the proportion of probes detected above the median of the GC band control signals, where DABG ranged from 80.5-86.3% in the 3'IVT module and 84.1-89.3% in the exon module, and 78.8% and 82.3% in the 3'IVT and exon modules respectively for the dimmer slide. All hybridizations were well in the expected range for *D. melanogaster* given that an average of 72% DABG was reported for heterologous hybridizations in *D. simulans* (Yang, Graze et al. 2011). Despite the dimmer slide, Kappa statistics indicated good agreement between biological replicates at the individual probe level, and excellent agreement at the probeset and gene level when modules were considered separately (Table 1.). Within a slide, signals for probesets corresponding to the same gene in the 3'IVT and exon modules were in good agreement indicating inter-slide reliability of gene expression between modules (Table 1.). Normalised signal agreement between the *heat shock* genes (*Hsps*) was excellent within and between modules (Table 1.), in addition average signal intensities of seven early responding *Hsps* correlate strongly ( $R$  0.77-0.99,  $P$  <0.05- 0.0001, Fig S1).

Overall expression patterns at the level of sampling temperature and time-point were visualised using hierarchical clustering. Average linkage clustering was applied to the average normalised signals of 1114, 1285, and 1173 differentially expressed genes from the 3'IVT, exon constitutive and exon modules respectively (Fig S2). The modules clustered similarly, with the dendograms revealing two main expression clusters; 1) the early time points plus 48 hours, and 2) the mid time-points (Fig S2). For cluster 1, the high temperature points clustered closely with time zero in the 3'IVT module (Fig S2a), while these were more similar to 4 hours recovery in the exon module (Fig S2b,c). In all cases, expression tended to return to basal levels by 48 hours recovery indicated by the grouping of time zero and 48 hours. Cluster 2 comprised the 8 and 12 hour recovery points, while 36 hours recovery grouped independently (Figure S2).

**Table S1 Primer sequences for real-time PCR**

| Gene           | Isoform/s | Forward                         | Reverse                              | Transcript type |
|----------------|-----------|---------------------------------|--------------------------------------|-----------------|
| <b>RPL11</b>   | RA        | CGA TCC CTC CAT CGG TAT CT      | AAC CAC TTC ATG GCA TCC TC           | mRNA            |
| <b>Hsrw</b>    | RB:RF     | TCC GCA TTT ATT TTT CTC CAC     | GTG TAT AGA ATT TGG GAC CTC CA       | nCRNA           |
|                | RA:RD:RG  | TAG GAA GCC AGT GGG             | CCG AGT GCG TTT TCA GCA              | nCRNA           |
| <b>Gr85a</b>   | RA        | TGG AAC GAA GTA TCG AAT GGC T   | CAC CAT GTA GAG CAC GTG GA           | mRNA            |
|                | RA        | TGT ATC CAA CCA TTG ATG CTC T   | GGA TTG GAA CGC CAG GAT AC           | pre-mRNA        |
| <b>Aur</b>     | RA        | ACC AAG ACT GAA ACC CAG CC      | TTT CCC GCG CCA AAT AAA CG           | mRNA            |
|                | primary   | GAA AAT GCT CCG CAC AGA A       | TTT CAG CTG CAC TCC AGA GA           | pre-mRNA        |
| <b>CG31287</b> | RA        | TGC CAA AAA TGC ACT TCC CA      | ACT CGG ATA GCT CTG CTC CA           | mRNA            |
|                | primary   | AGA TCC GTC GAC ATT CCT GT      | TGC CTA TGG CCA TTG AGT CT           | pre-mRNA        |
| <b>CG5608</b>  | RA        | CGC AGG AGA TCG AGA AAA TGG     | CAG ACC GAT AAG CGC TCC TT           | mRNA            |
|                | primary   | TCA CCT GGA TAC GAG AGT TTG     | GGA ATT AAA CGA GCG CTT TC           | pre-mRNA        |
| <b>CG12267</b> | RA        | TCA AGT TCA GGC TGG TGG AC      | ACC AGG TGA ACG TAA CGA GG           | mRNA            |
|                | primary   | CCA GGA ACA GTT TAT TCA TGT CA  | TTT CCT CGA CCA CAC TCA CA           | pre-mRNA        |
| <b>CG10264</b> | RA        | GAG AGG CCC TCG TGG CT          | CGG AAA GCA TCC CTC GAA GA           | mRNA            |
|                | primary   | CGG CAA CCT GGT GCT ATC         | TTT CCT CGA CCA CAC TCA CA           | pre-mRNA        |
| <b>Hsp83</b>   | RA        | CAT ACA AGA TGC CAG AAG AAG C   | TGG GGT CAG TAA GGG ACT CA           | mRNA            |
|                | primary   | TGA GGC ATG TGC AAA AGA GA      | AGC CTG GAA TGC AAA GGT C            | pre-mRNA        |
| <b>Stv</b>     | primary   | CCC AAA ACG CTT ACG GAT CG      | GGG GGC CAC TCA CCT GAA AA           | pre-mRNA        |
|                | RA:RE:RF  | CAC AGT TCC ACA CTC CCC AA      | GAA TCC AAA GGT CGG CTG AA           | mRNA            |
|                | RB:RC:RG  | GTC ACC AAG CGG AAA AGC AT      | CAA AGG TCG GCT TTT GCC TG           | mRNA            |
|                | RD        | ACA TAG TTG ATG TGA AAC AGC G   | CCA AAG GTC GGC TGT TTT ATA ATT<br>T | mRNA            |
| <b>Hsc70-4</b> | primary   | CAG TTT GAT CGA AGG TGC GG      | ACT TAA TCG AGG TGG TCG CA           | pre-mRNA        |
|                | RA        | CAG TTT GAT CGA AGG TGC G       | CAG GAG CTT TAG ACA TCT TGT G        | mRNA            |
|                | RD        | CGT AAT TGA TGT CTA AAG CTC C   | GAG TGG TAC GAT TAC CCT G            | mRNA            |
| <b>Hsc70-3</b> | primary   | GGG CAC AGT GAT CGG CAT T       | GGG TTT TAG AGC CGA AGG ACG          | pre-mRNA        |
| <b>Srp</b>     | RA:RD:RF: | AGG AAG AGA GGA GCC AAA GAG     | CAA CGA GCC AGC ATA AAC AGA          | mRNA            |
|                | RG        | AGG                             | GTC                                  |                 |
|                | RA:RB     | CAG AGC TTC ACC CAG CTG AC      | AAC AGA GCT GTT CTG CAA GC           | mRNA            |
| <b>Xrp1</b>    | RB:RE     | CGG GAC ACT ATT TGT GCA ATG CC  | CGC TTT GAG GCG CTC AAT CTT C        | mRNA            |
|                | RB        | GTC GCC GCA CTT TCT TTT GA      | ACA AGT TCC CCT TAA ACC TCC A        | mRNA            |
|                | RD        | CGG AAC CGC TTA AAA GAC AGC     | TTC CGT TTT CGC TGT TGC AC           | mRNA            |
| <b>CG10924</b> | RA        | CCA AGA GTA TTA GCG GGC GA      | TGT GGT GAG ACC AAT CCG C            | mRNA            |
|                | RB        | TGC TCG TTT CGG TTA GTC GG      | CGG TGT GGT GAG ACC AAT CTT T        | mRNA            |
| <b>Kay</b>     | RA        | ACT TTC TGC CCG CCG ATC TAA G   | GGT CTC AAA GTT GCC GAG GAT<br>AAG   | mRNA            |
|                | RB        | TCG GTG TGC GGA ATA CAA AGG C   | TCG TAT GGC CGC ACA AAG TCT G        | mRNA            |
|                | RD        | ACA GCA TCA GCG ACA GGA TTA TGC | CGG TCT CAA AGT TGC CGA GTT G        | mRNA            |
|                | RF        | CTT TGC AAT GGA CGC CAG TGA G   | AAA GTT GCC GAG CTG CTG TAG G        | mRNA            |



**Table S2 Kappa statistics for signal intensity agreement within modules at the individual (raw) probe, normalised probeset, and gene levels.** Signal agreement between the 3'IVT and exons modules was comparable at the gene level only.

| Module/s                         | Weighted Kappa Coefficient (range) |           |             |                           |
|----------------------------------|------------------------------------|-----------|-------------|---------------------------|
|                                  | Individual probes                  | Probesets | Genes (all) | Genes (Hsps) <sup>c</sup> |
| <b>3'IVT<sup>a</sup></b>         | 0.69-0.77                          | 0.88-0.93 | 0.89-0.93   | 0.80-1                    |
| <b>Exon<sup>a</sup></b>          | 0.74-0.8                           | 0.87-0.92 | 0.89-0.94   | 0.86-1                    |
| <b>3'IVT vs exon<sup>b</sup></b> | N/A                                | N/A       | 0.61-0.68   | 0.66-1                    |

<sup>a</sup>Kappa statistics were calculated for each module between replicate slides

<sup>b</sup>Kappa statistics were calculated between modules on the same slide

<sup>c</sup>Agree statistics were calculated only for comparisons where the number of rows and columns were equal

Available for download at <http://www.genetics.org/lookup/suppl/doi:10.1534/genetics.113.156224/-/DC1>

**Table S3** Gene level average log background corrected signals from Model I analyses (fixed term of time-point).

**Table S4** STEM profiling for significant genes (time-point term) from the constitutive exon analysis.

**Table S5** DAVID functional annotation clustering analysis of the genes from the enriched recovery STEM profiles as well as the 'early up' profiles from the gene-level analyses (FDR 0.05).

**Table S6** Table of genes spanning the repertoire of the *Drosophila* innate immune response from the gene-level (constitutive probeset) analyses.

**Table S7 Results for two-way ANOVAs testing for expression changes over time following heat stress (time term), transcript-type (transcript, mRNA or pre-mRNA) and interaction term. Significant terms are bolded.**

| <b>Gene</b>    | <b>Effect</b>   | <b>DF</b> | <b>SS</b> | <b>MS</b> | <b>Fvalue</b> | <b>Pvalue</b> |
|----------------|-----------------|-----------|-----------|-----------|---------------|---------------|
| <i>CG10264</i> | time            | 7         | 64.09     | 9.150     | 6.77          | <b>0.0001</b> |
| <i>CG10264</i> | Transcript      | 1         | 11.36     | 11.36     | 8.40          | <b>0.0067</b> |
| <i>CG10264</i> | time*Transcript | 7         | 63.91     | 9.13      | 6.75          | <b>0.0001</b> |
| <i>CG12267</i> | time            | 7         | 61.93     | 8.84      | 18.16         | <b>0.0000</b> |
| <i>CG12267</i> | Transcript      | 1         | 138.09    | 138.09    | 283.38        | <b>0.0000</b> |
| <i>CG12267</i> | time*Transcript | 7         | 44.47     | 6.35      | 13.04         | <b>0.0000</b> |
| <i>CG32187</i> | time            | 7         | 55.38     | 7.91      | 17.91         | <b>0.0000</b> |
| <i>CG32187</i> | Transcript      | 1         | 0.020     | 0.02      | 0.05          | 0.8294        |
| <i>CG32187</i> | time*Transcript | 7         | 7.105     | 1.01      | 2.30          | 0.0532        |
| <i>CG5608</i>  | time            | 7         | 69.16     | 9.88      | 20.53         | <b>0.0000</b> |
| <i>CG5608</i>  | Transcript      | 1         | 69.17     | 69.17     | 143.75        | <b>0.0000</b> |
| <i>CG5608</i>  | time*Transcript | 7         | 58.90     | 8.41      | 17.49         | <b>0.0000</b> |
| <i>Hsp83</i>   | time            | 7         | 133.96    | 19.13     | 38.00         | <b>0.0000</b> |
| <i>Hsp83</i>   | Transcript      | 1         | 649.16    | 649.16    | 1288.98       | <b>0.0000</b> |
| <i>Hsp83</i>   | time*Transcript | 7         | 56.23     | 8.03      | 15.95         | <b>0.0000</b> |
| <i>Aur</i>     | time            | 7         | 131.02    | 18.71     | 12.20         | <b>0.0000</b> |
| <i>Aur</i>     | Transcript      | 1         | 374.94    | 374.94    | 244.35        | <b>0.0000</b> |
| <i>Aur</i>     | time*Transcript | 7         | 109.20    | 15.60     | 10.17         | <b>0.0000</b> |
| <i>gr85A</i>   | time            | 7         | 54.437    | 7.776     | 10.16         | <b>0.0000</b> |
| <i>gr85A</i>   | Transcript      | 1         | 142.06    | 142.06    | 185.55        | <b>0.0000</b> |
| <i>gr85A</i>   | time*Transcript | 7         | 38.76     | 5.53      | 7.23          | <b>0.0000</b> |

**Table S8 Results for one-way ANOVAs with Dunnett's tests comparing pre-stress relative transcript abundances with high temperature (38.5°) and recovery (25C°). LSMean= least squares mean, significant terms are bolded.**

| Gene           | Transcript     | time           | LSMean      | Pvalue        |             |
|----------------|----------------|----------------|-------------|---------------|-------------|
| <b>CG10264</b> | mRNA           | 0              | -16.7583361 |               |             |
|                |                | 0.25           | -15.9483352 | 0.9714        |             |
|                |                | 0.53           | -16.3533329 | 0.9995        |             |
|                |                | 4.315          | -15.5166648 | 0.8255        |             |
|                |                | 8.315          | -15.4900004 | 0.8124        |             |
|                |                | 12.315         | -15.0916692 | 0.5932        |             |
|                |                | 36.315         | -15.9966668 | 0.9791        |             |
|                |                | 48.315         | -16.2116654 | 0.9967        |             |
|                |                | Pre-mRNA       | 0           | -16.4033326   |             |
|                | 0.25           |                | -12.4600007 | <b>0.0001</b> |             |
|                | 0.53           |                | -12.0166658 | <b>0.0000</b> |             |
|                | 4.315          |                | -11.9433335 | <b>0.0000</b> |             |
|                | 8.315          |                | -15.4550002 | 0.5240        |             |
|                | 12.315         |                | -16.8533346 | 0.9638        |             |
|                | 36.315         |                | -17.7083332 | 0.2303        |             |
|                | 48.315         |                | -16.7416690 | 0.9918        |             |
|                | <b>CG12267</b> |                | mRNA        | 0             | -7.4566667  |
|                |                | 0.25           |             | -7.1916666    | 0.9822      |
| 0.53           |                | -6.6366666     |             | 0.2932        |             |
| 4.315          |                | -7.4450001     |             | 1.0000        |             |
| 8.315          |                | -6.9816666     |             | 0.7843        |             |
| 12.315         |                | -6.9500000     |             | 0.7369        |             |
| 36.315         |                | -7.0916666     |             | 0.9188        |             |
| 48.315         |                | -7.5283333     |             | 1.0000        |             |
| pre-mRNA       |                | 0              |             | -15.3516682   |             |
|                |                | 0.25           | -11.1433333 | <b>0.0001</b> |             |
|                |                | 0.53           | -8.1049998  | <b>0.0000</b> |             |
|                |                | 4.315          | -8.8616665  | <b>0.0000</b> |             |
|                |                | 8.315          | -9.5366668  | <b>0.0000</b> |             |
|                |                | 12.315         | -10.0699998 | <b>0.0000</b> |             |
|                |                | 36.315         | -9.8750003  | <b>0.0000</b> |             |
|                |                | 48.315         | -11.4766660 | <b>0.0002</b> |             |
|                |                | <b>CG32187</b> | mRNA        | 0             | -16.8366663 |
| 0.25           |                |                |             | -16.9783335   | 0.9999      |
| 0.53           | -16.3133328    |                |             | 0.8981        |             |
| 4.315          | -13.4783311    |                |             | <b>0.0002</b> |             |
| 8.315          | -12.8400027    |                |             | <b>0.0001</b> |             |
| 12.315         | -15.5800008    |                |             | 0.1967        |             |
| pre-mRNA       | 0              |                | -16.1916670 | 0.7838        |             |
|                | 0.25           |                | -15.3650017 | 0.4116        |             |
|                | 0.53           |                | -15.8116684 | 0.9310        |             |
|                | 4.315          |                | -13.7866662 | <b>0.0014</b> |             |
|                | 8.315          |                | -13.9674991 | <b>0.0068</b> |             |
|                | 12.315         |                | -16.0000006 | 0.9968        |             |
|                | 36.315         |                | -15.9383329 | 0.9879        |             |
|                | 48.315         |                | -16.6700025 | 0.9225        |             |

|               |              |          |             |               |
|---------------|--------------|----------|-------------|---------------|
| <i>CG5608</i> | mRNA         | 0        | -8.3016668  |               |
|               |              | 0.25     | -8.0700000  | 0.9986        |
|               |              | 0.53     | -7.6583333  | 0.7849        |
|               |              | 4.315    | -8.4150002  | 1.0000        |
|               |              | 8.315    | -7.4016666  | 0.4928        |
|               |              | 12.315   | -7.8383334  | 0.9388        |
|               |              | 36.315   | -7.0016667  | 0.1721        |
|               |              | 48.315   | -7.9349999  | 0.9802        |
|               |              | pre-mRNA | 0           | -14.3666667   |
|               | 0.25         |          | -9.8333336  | <b>0.0000</b> |
|               | 0.53         |          | -6.6416667  | <b>0.0000</b> |
|               | 4.315        |          | -7.9500001  | <b>0.0000</b> |
|               | 8.315        |          | -9.2449999  | <b>0.0000</b> |
|               | 12.315       |          | -11.7933334 | <b>0.0019</b> |
|               | <i>Hsp83</i> | mRNA     | 0           | -2.2916667    |
| 0.25          |              |          | -1.6900000  | 0.7346        |
| 0.53          |              |          | -1.3366667  | 0.3080        |
| 4.315         |              |          | 0.5733333   | <b>0.0002</b> |
| 8.315         |              |          | 0.2375000   | <b>0.0024</b> |
| 12.315        |              |          | -2.4100000  | 1.0000        |
| 36.315        |              |          | -1.4116667  | 0.3833        |
| 48.315        |              |          | -1.3033333  | 0.2782        |
| pre-mRNA      |              |          | 0           | -14.8999997   |
|               |              | 0.25     | -7.6866666  | <b>0.0000</b> |
|               |              | 0.53     | -6.5233334  | <b>0.0000</b> |
|               |              | 4.315    | -5.7883333  | <b>0.0000</b> |
|               |              | 8.315    | -7.0400001  | <b>0.0000</b> |
|               |              | 12.315   | -8.7466664  | <b>0.0000</b> |
| <i>aur</i>    |              | mRNA     | 0           | -4.3550000    |
|               | 0.25         |          | -3.8966667  | 0.9939        |
|               | 0.53         |          | -3.9383333  | 0.9965        |
|               | 4.315        |          | -5.2000000  | 0.8809        |
|               | 8.315        |          | -3.3883333  | 0.8069        |
|               | 12.315       |          | -3.7900000  | 0.9810        |
|               | 36.315       |          | -5.3866667  | 0.7621        |
|               | 48.315       |          | -3.9850000  | 0.9983        |
|               | pre-mRNA     |          | 0           | -17.2433333   |
|               |              | 0.25     | -9.8766670  | <b>0.0000</b> |
|               |              | 0.53     | -7.1400001  | <b>0.0000</b> |
|               |              | 4.315    | -7.9633332  | <b>0.0000</b> |
|               |              | 8.315    | -7.1616666  | <b>0.0000</b> |
|               |              | 12.315   | -8.1666669  | <b>0.0000</b> |
|               | <i>Gr85a</i> | mRNA     | 0           | -18.4216659   |
| 0.25          |              |          | -18.1483327 | 0.9992        |
| 0.53          |              |          | -18.4624992 | 1.0000        |
| 4.315         |              |          | -17.1700001 | 0.4185        |
| 8.315         |              |          | -16.7466676 | 0.1727        |
| 12.315        |              |          | -17.0500007 | 0.3321        |

---

|                 |        |             |               |
|-----------------|--------|-------------|---------------|
|                 | 36.315 | -18.2216673 | 0.9999        |
|                 | 48.315 | -17.7816679 | 0.9174        |
| <b>pre-mRNA</b> | 0      | -17.4133322 |               |
|                 | 0.25   | -12.1449989 | <b>0.0000</b> |
|                 | 0.53   | -11.9566662 | <b>0.0000</b> |
|                 | 4.315  | -12.3683326 | <b>0.0000</b> |
|                 | 8.315  | -13.8200010 | <b>0.0005</b> |
|                 | 12.315 | -15.0516677 | <b>0.0189</b> |
|                 | 36.315 | -15.2083341 | <b>0.0296</b> |
|                 | 48.315 | -15.5583342 | 0.0789        |

---

**Table S9 ANOVA results for model III fit with the constitutive exons as a covariate for 1,094 genes with constitutive exons and at least two alternative exons.** The main effects of constitutive exon, alternative exon, time-point and alternative exon-by-time-point interactions are shown. Results are based on type III SS, significance threshold <0.2.

| <b>FDR level</b> | <b>Constitutive exon</b> | <b>Alternative exons</b> | <b>Time-Point</b> | <b>Alternative exon-by-time-point interaction</b> |
|------------------|--------------------------|--------------------------|-------------------|---------------------------------------------------|
| <b>&lt;0.05</b>  | 1408                     | 1031                     | 29                | 56                                                |
| <b>&lt;0.1</b>   | 88                       | 12                       | 8                 | 20                                                |
| <b>&lt;0.2</b>   | 120                      | 8                        | 27                | 24                                                |
| <b>&gt;0.2</b>   | 295                      | 43                       | 1030              | 994                                               |

Available for download at <http://www.genetics.org/lookup/suppl/doi:10.1534/genetics.113.156224/-/DC1>

**Table S10** Isoform/isoform subset level average log background corrected signals from Model II and III analyses.

**Table S11** STEM profiling for significant multi-transcript genes from the master list (time-point term, time-point-by-exon-type interactions).

**Table S12** DAVID functional annotation clustering analysis of the isoforms/subsets from the enriched recovery STEM profiles as well as the 'early up' profiles from the significant genes from the master list from models II and III.
