# Supplementary material
Source: PubMed Central journal article supplement (PMC3813866)
Supplement: supp_113.156224_FigureS1.pdf [file supp_113.156224_FigureS1.pdf]

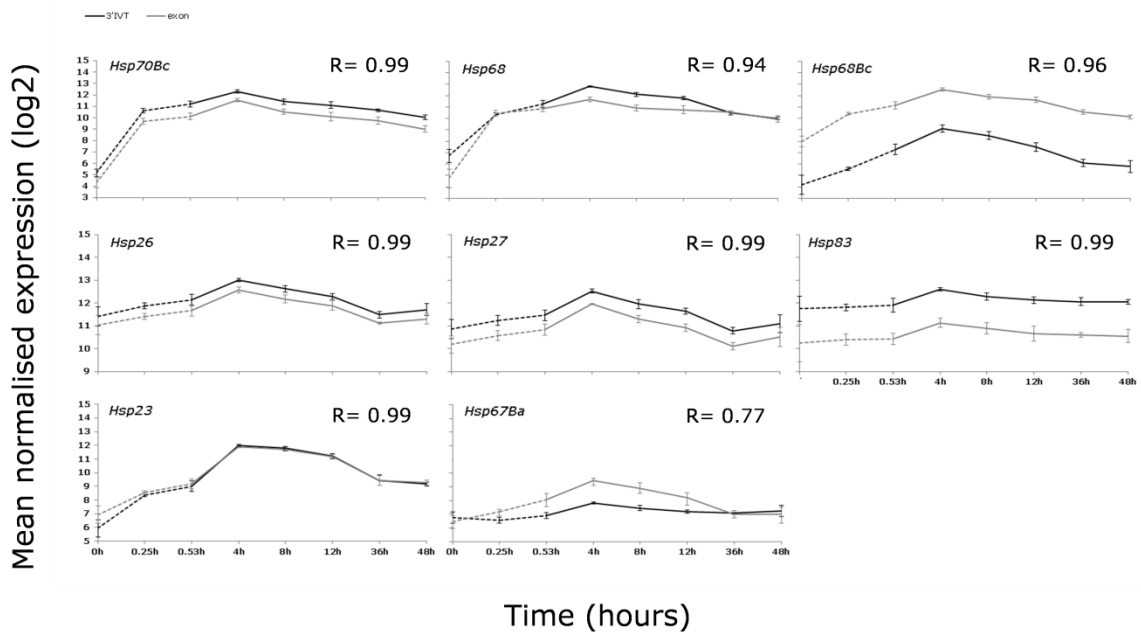

**Figure S1** High signal comparability of the 3'IVT (black line) and exon modules (grey line) for eight thermally responsive *Hsps*. Dashed lines indicate thermal stress at 38.5°C, solid lines indicate recovery up to 48 hours post stress at 25°C. Signals are shown as average normalized expression on the Y-axis. Pearson's *R* is shown in the right hand corner of each graph.
