# Supplementary material
Source: PubMed Central journal article supplement (PMC3813866)
Supplement: supp_113.156224_FigureS3.pdf [file supp_113.156224_FigureS3.pdf]

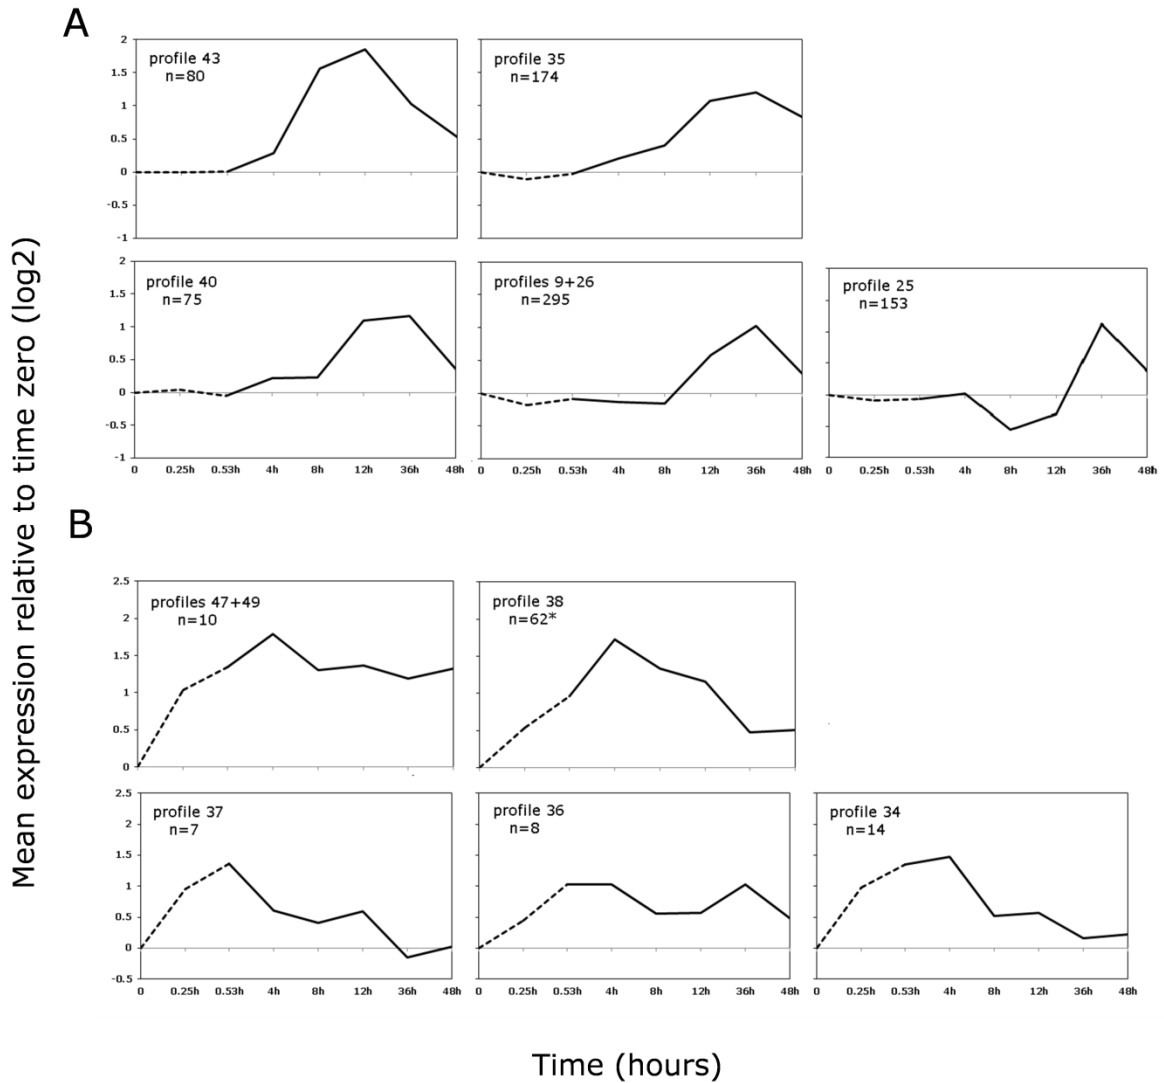

**Figure S3 Short time-series expression miner (STEM) profiles of 1078 genes identified from the 3'IVT probe module with ANOVA.** Average normalized (relative to time zero) signals of each profile/profile cluster are shown on the Y-axis, time in hours is shown on the X-axis. The dashed line indicates thermal stress sampled at 15 and 31.5 minutes at 38.5°, solid line indicates recovery up to 48 hours post stress at 25°. (A) Profiles enriched for mid-late recovery expressed genes with peak expression at 12 or 36 hours. Rapidly heat responsive genes (B) are under enriched with peak at either at late stress/early recovery.
