# Supplementary material
Source: PubMed Central journal article supplement (PMC3813866)
Supplement: supp_113.156224_FigureS4.pdf [file supp_113.156224_FigureS4.pdf]

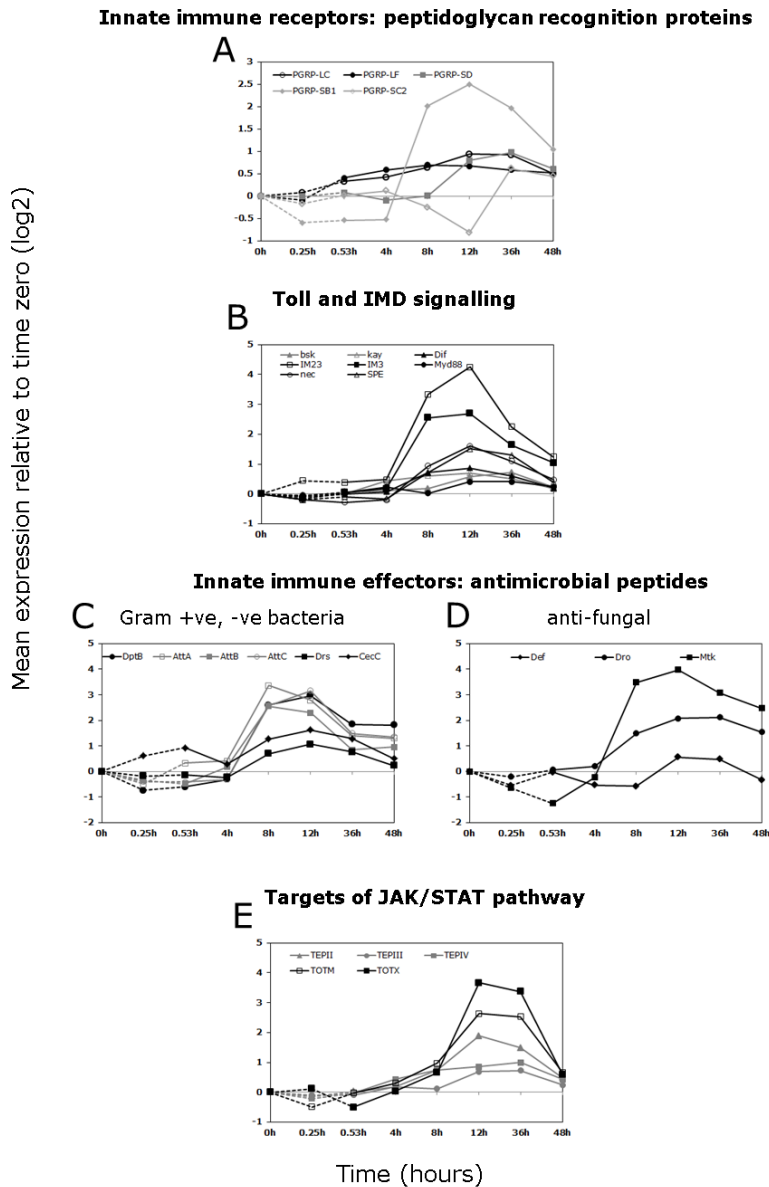

**Figure S4 Up-regulation of genes spanning the repertoire of *Drosophila* innate immune response.** Dashed lines indicate thermal stress at 38.5<sup>o</sup>, solid lines indicate recovery up to 48 hours post stress at 25<sup>o</sup>. Exon profiles from the microarray analyses (constitutive exon set) are shown as average normalized expression relative to time zero on the Y-axis (log<sub>2</sub>). A) Expression profiles of the PGRPs that activate the immune pathways to regulate the expression of antimicrobial peptides; PGRP-LC and LF (black circles) are required to activate the IMD pathway, PGRP-SD (dark grey squares) is required to activate the Toll pathway, other non-activating PGRPs SB1 and SC2 (light grey triangles). B) IMD (grey) and Toll (black) signaling components. C) Bacterial (gram -ve (IMD) and +ve (Toll)) and D) fungal (Toll) AMPs activated by the humoral immune pathways. E) AMPs and other genes regulated by the JAK/STAT pathway (IMD).
