# Supplementary material
Source: PubMed Central journal article supplement (PMC3813866)
Supplement: supp_113.156224_FigureS5.pdf [file supp_113.156224_FigureS5.pdf]

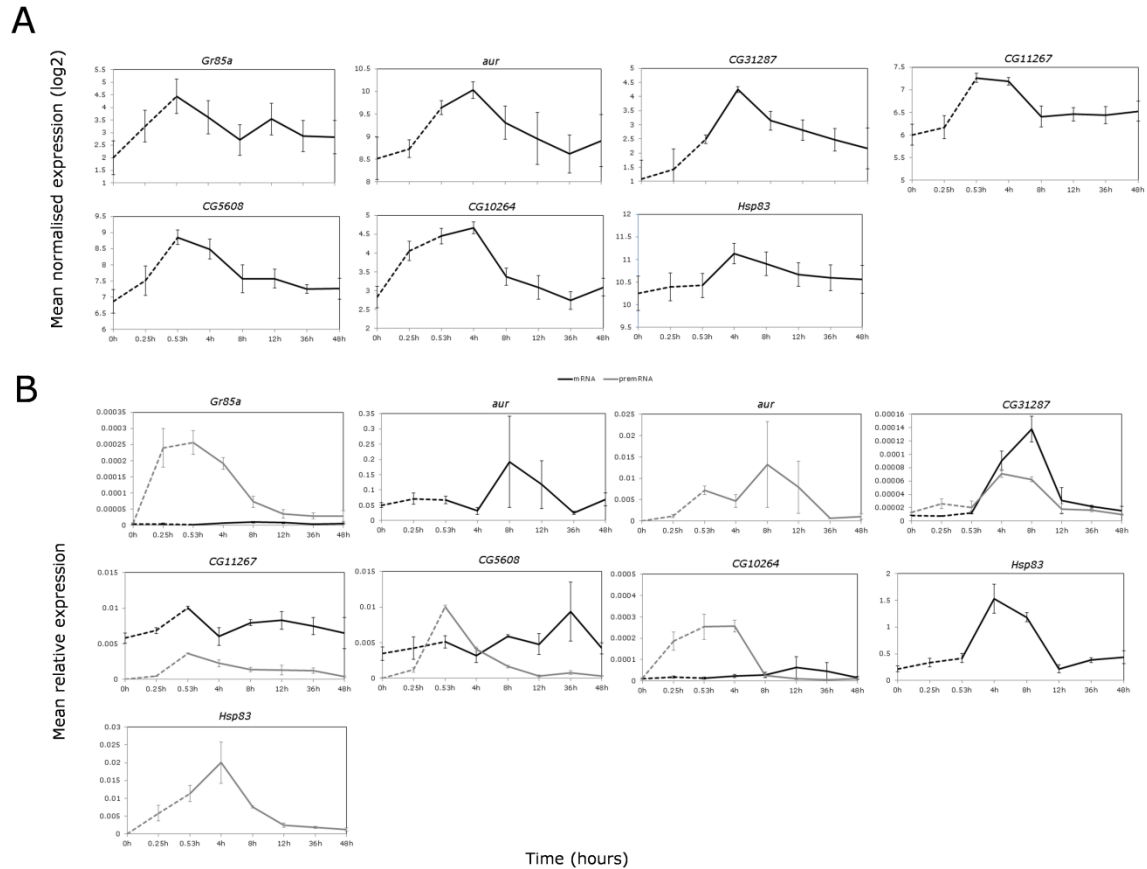

**Figure S5 Detailed transcript analyses of early responding genes confirm RNA splicing inhibition during heat shock.** Dashed lines indicate thermal stress at 38.5°, solid lines indicate recovery up to 48 hours post stress at 25°. Exon profiles from the microarray analyses (constitutive exon set), shown as average normalized expression on the Y-axis (log2). B) Real-time PCR profiling using exon-junction primers to target mature mRNA levels (black line) and intron/exon primers to target pre-mRNA levels (grey line) relative to *RpL11* (Y-axis). Negligible *Gr85a* and *CG10264* mRNA suggests that these genes may be transcriptionally active during heat shock. *Hsp83* is shown in the last panels of A and B to confirm nascent transcript accumulation during heat stress. Error bars are the  $\pm$  SE of the mean.
