# Supplementary material
Source: PubMed Central journal article supplement (PMC3813866)
Supplement: supp_113.156224_FigureS6.pdf [file supp_113.156224_FigureS6.pdf]

Mean relative expression

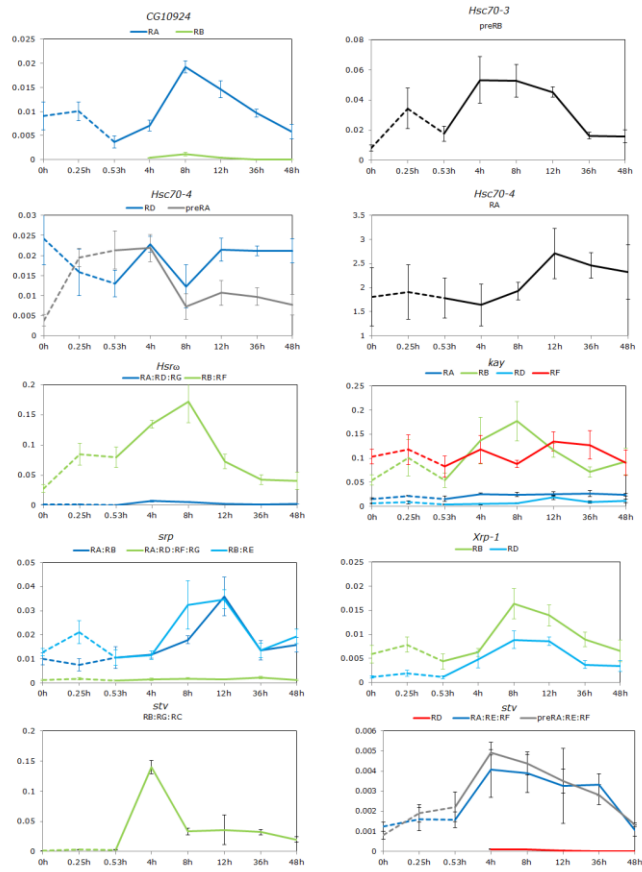

Time (hours)

**Figure S6** Raw data for PCR data for multi-transcript genes using exon-junction primers to target mature mRNA levels and intron/exon primers to target pre-mRNA levels relative to *RpL11* (Y-axis). Error bars are the  $\pm$  SE of the mean.
