# Supplementary material
Source: PubMed Central journal article supplement (PMC3813866)
Supplement: supp_113.156224_TableS1.pdf [file supp_113.156224_TableS1.pdf]

**Table S1 Primer sequences for real-time PCR**

| Gene           | Isoform/s | Forward                         | Reverse                              | Transcript type |
|----------------|-----------|---------------------------------|--------------------------------------|-----------------|
| <b>RPL11</b>   | RA        | CGA TCC CTC CAT CGG TAT CT      | AAC CAC TTC ATG GCA TCC TC           | mRNA            |
| <b>Hsrw</b>    | RB:RF     | TCC GCA TTT ATT TTT CTC CAC     | GTG TAT AGA ATT TGG GAC CTC CA       | nCRNA           |
|                | RA:RD:RG  | TAG GAA GCC AGT GGG             | CCG AGT GCG TTT TCA GCA              | nCRNA           |
| <b>Gr85a</b>   | RA        | TGG AAC GAA GTA TCG AAT GGC T   | CAC CAT GTA GAG CAC GTG GA           | mRNA            |
|                | RA        | TGT ATC CAA CCA TTG ATG CTC T   | GGA TTG GAA CGC CAG GAT AC           | pre-mRNA        |
| <b>Aur</b>     | RA        | ACC AAG ACT GAA ACC CAG CC      | TTT CCC GCG CCA AAT AAA CG           | mRNA            |
|                | primary   | GAA AAT GCT CCG CAC AGA A       | TTT CAG CTG CAC TCC AGA GA           | pre-mRNA        |
| <b>CG31287</b> | RA        | TGC CAA AAA TGC ACT TCC CA      | ACT CGG ATA GCT CTG CTC CA           | mRNA            |
|                | primary   | AGA TCC GTC GAC ATT CCT GT      | TGC CTA TGG CCA TTG AGT CT           | pre-mRNA        |
| <b>CG5608</b>  | RA        | CGC AGG AGA TCG AGA AAA TGG     | CAG ACC GAT AAG CGC TCC TT           | mRNA            |
|                | primary   | TCA CCT GGA TAC GAG AGT TTG     | GGA ATT AAA CGA GCG CTT TC           | pre-mRNA        |
| <b>CG12267</b> | RA        | TCA AGT TCA GGC TGG TGG AC      | ACC AGG TGA ACG TAA CGA GG           | mRNA            |
|                | primary   | CCA GGA ACA GTT TAT TCA TGT CA  | TTT CCT CGA CCA CAC TCA CA           | pre-mRNA        |
| <b>CG10264</b> | RA        | GAG AGG CCC TCG TGG CT          | CGG AAA GCA TCC CTC GAA GA           | mRNA            |
|                | primary   | CGG CAA CCT GGT GCT ATC         | TTT CCT CGA CCA CAC TCA CA           | pre-mRNA        |
| <b>Hsp83</b>   | RA        | CAT ACA AGA TGC CAG AAG AAG C   | TGG GGT CAG TAA GGG ACT CA           | mRNA            |
|                | primary   | TGA GGC ATG TGC AAA AGA GA      | AGC CTG GAA TGC AAA GGT C            | pre-mRNA        |
| <b>Stv</b>     | primary   | CCC AAA ACG CTT ACG GAT CG      | GGG GGC CAC TCA CCT GAA AA           | pre-mRNA        |
|                | RA:RE:RF  | CAC AGT TCC ACA CTC CCC AA      | GAA TCC AAA GGT CGG CTG AA           | mRNA            |
|                | RB:RC:RG  | GTC ACC AAG CGG AAA AGC AT      | CAA AGG TCG GCT TTT GCC TG           | mRNA            |
|                | RD        | ACA TAG TTG ATG TGA AAC AGC G   | CCA AAG GTC GGC TGT TTT ATA ATT<br>T | mRNA            |
| <b>Hsc70-4</b> | primary   | CAG TTT GAT CGA AGG TGC GG      | ACT TAA TCG AGG TGG TCG CA           | pre-mRNA        |
|                | RA        | CAG TTT GAT CGA AGG TGC G       | CAG GAG CTT TAG ACA TCT TGT G        | mRNA            |
|                | RD        | CGT AAT TGA TGT CTA AAG CTC C   | GAG TGG TAC GAT TAC CCT G            | mRNA            |
| <b>Hsc70-3</b> | primary   | GGG CAC AGT GAT CGG CAT T       | GGG TTT TAG AGC CGA AGG ACG          | pre-mRNA        |
| <b>Srp</b>     | RA:RD:RF: | AGG AAG AGA GGA GCC AAA GAG     | CAA CGA GCC AGC ATA AAC AGA          | mRNA            |
|                | RG        | AGG                             | GTC                                  |                 |
|                | RA:RB     | CAG AGC TTC ACC CAG CTG AC      | AAC AGA GCT GTT CTG CAA GC           | mRNA            |
| <b>Xrp1</b>    | RB:RE     | CGG GAC ACT ATT TGT GCA ATG CC  | CGC TTT GAG GCG CTC AAT CTT C        | mRNA            |
|                | RB        | GTC GCC GCA CTT TCT TTT GA      | ACA AGT TCC CCT TAA ACC TCC A        | mRNA            |
|                | RD        | CGG AAC CGC TTA AAA GAC AGC     | TTC CGT TTT CGC TGT TGC AC           | mRNA            |
| <b>CG10924</b> | RA        | CCA AGA GTA TTA GCG GGC GA      | TGT GGT GAG ACC AAT CCG C            | mRNA            |
|                | RB        | TGC TCG TTT CGG TTA GTC GG      | CGG TGT GGT GAG ACC AAT CTT T        | mRNA            |
| <b>Kay</b>     | RA        | ACT TTC TGC CCG CCG ATC TAA G   | GGT CTC AAA GTT GCC GAG GAT<br>AAG   | mRNA            |
|                | RB        | TCG GTG TGC GGA ATA CAA AGG C   | TCG TAT GGC CGC ACA AAG TCT G        | mRNA            |
|                | RD        | ACA GCA TCA GCG ACA GGA TTA TGC | CGG TCT CAA AGT TGC CGA GTT G        | mRNA            |
|                | RF        | CTT TGC AAT GGA CGC CAG TGA G   | AAA GTT GCC GAG CTG CTG TAG G        | mRNA            |
