# Supplementary material
Source: PubMed Central journal article supplement (PMC3813866)
Supplement: supp_113.156224_TableS2.pdf [file supp_113.156224_TableS2.pdf]

**Table S2 Kappa statistics for signal intensity agreement within modules at the individual (raw) probe, normalised probeset, and gene levels.** Signal agreement between the 3'IVT and exons modules was comparable at the gene level only.

| Module/s                         | Weighted Kappa Coefficient (range) |           |             |                           |
|----------------------------------|------------------------------------|-----------|-------------|---------------------------|
|                                  | Individual probes                  | Probesets | Genes (all) | Genes (Hsps) <sup>c</sup> |
| <b>3'IVT<sup>a</sup></b>         | 0.69-0.77                          | 0.88-0.93 | 0.89-0.93   | 0.80-1                    |
| <b>Exon<sup>a</sup></b>          | 0.74-0.8                           | 0.87-0.92 | 0.89-0.94   | 0.86-1                    |
| <b>3'IVT vs exon<sup>b</sup></b> | N/A                                | N/A       | 0.61-0.68   | 0.66-1                    |

<sup>a</sup>Kappa statistics were calculated for each module between replicate slides

<sup>b</sup>Kappa statistics were calculated between modules on the same slide

<sup>c</sup>Agree statistics were calculated only for comparisons where the number of rows and columns were equal
