# Supplementary material
Source: PubMed Central journal article supplement (PMC3813866)
Supplement: supp_113.156224_TableS7.pdf [file supp_113.156224_TableS7.pdf]

**Table S7 Results for two-way ANOVAs testing for expression changes over time following heat stress (time term), transcript-type (transcript, mRNA or pre-mRNA) and interaction term. Significant terms are bolded.**

| <b>Gene</b>    | <b>Effect</b>   | <b>DF</b> | <b>SS</b> | <b>MS</b> | <b>Fvalue</b> | <b>Pvalue</b> |
|----------------|-----------------|-----------|-----------|-----------|---------------|---------------|
| <i>CG10264</i> | time            | 7         | 64.09     | 9.150     | 6.77          | <b>0.0001</b> |
| <i>CG10264</i> | Transcript      | 1         | 11.36     | 11.36     | 8.40          | <b>0.0067</b> |
| <i>CG10264</i> | time*Transcript | 7         | 63.91     | 9.13      | 6.75          | <b>0.0001</b> |
| <i>CG12267</i> | time            | 7         | 61.93     | 8.84      | 18.16         | <b>0.0000</b> |
| <i>CG12267</i> | Transcript      | 1         | 138.09    | 138.09    | 283.38        | <b>0.0000</b> |
| <i>CG12267</i> | time*Transcript | 7         | 44.47     | 6.35      | 13.04         | <b>0.0000</b> |
| <i>CG32187</i> | time            | 7         | 55.38     | 7.91      | 17.91         | <b>0.0000</b> |
| <i>CG32187</i> | Transcript      | 1         | 0.020     | 0.02      | 0.05          | 0.8294        |
| <i>CG32187</i> | time*Transcript | 7         | 7.105     | 1.01      | 2.30          | 0.0532        |
| <i>CG5608</i>  | time            | 7         | 69.16     | 9.88      | 20.53         | <b>0.0000</b> |
| <i>CG5608</i>  | Transcript      | 1         | 69.17     | 69.17     | 143.75        | <b>0.0000</b> |
| <i>CG5608</i>  | time*Transcript | 7         | 58.90     | 8.41      | 17.49         | <b>0.0000</b> |
| <i>Hsp83</i>   | time            | 7         | 133.96    | 19.13     | 38.00         | <b>0.0000</b> |
| <i>Hsp83</i>   | Transcript      | 1         | 649.16    | 649.16    | 1288.98       | <b>0.0000</b> |
| <i>Hsp83</i>   | time*Transcript | 7         | 56.23     | 8.03      | 15.95         | <b>0.0000</b> |
| <i>Aur</i>     | time            | 7         | 131.02    | 18.71     | 12.20         | <b>0.0000</b> |
| <i>Aur</i>     | Transcript      | 1         | 374.94    | 374.94    | 244.35        | <b>0.0000</b> |
| <i>Aur</i>     | time*Transcript | 7         | 109.20    | 15.60     | 10.17         | <b>0.0000</b> |
| <i>gr85A</i>   | time            | 7         | 54.437    | 7.776     | 10.16         | <b>0.0000</b> |
| <i>gr85A</i>   | Transcript      | 1         | 142.06    | 142.06    | 185.55        | <b>0.0000</b> |
| <i>gr85A</i>   | time*Transcript | 7         | 38.76     | 5.53      | 7.23          | <b>0.0000</b> |
