# Supplementary material
Source: PubMed Central journal article supplement (PMC3813866)
Supplement: supp_113.156224_TableS8.pdf [file supp_113.156224_TableS8.pdf]

**Table S8 Results for one-way ANOVAs with Dunnett's tests comparing pre-stress relative transcript abundances with high temperature (38.5°) and recovery (25C°). LSMean= least squares mean, significant terms are bolded.**

| Gene           | Transcript     | time     | LSMean      | Pvalue        |
|----------------|----------------|----------|-------------|---------------|
| <b>CG10264</b> | mRNA           | 0        | -16.7583361 |               |
|                |                | 0.25     | -15.9483352 | 0.9714        |
|                |                | 0.53     | -16.3533329 | 0.9995        |
|                |                | 4.315    | -15.5166648 | 0.8255        |
|                |                | 8.315    | -15.4900004 | 0.8124        |
|                |                | 12.315   | -15.0916692 | 0.5932        |
|                |                | 36.315   | -15.9966668 | 0.9791        |
|                |                | 48.315   | -16.2116654 | 0.9967        |
|                |                | Pre-mRNA | 0           | -16.4033326   |
|                | 0.25           |          | -12.4600007 | <b>0.0001</b> |
|                | 0.53           |          | -12.0166658 | <b>0.0000</b> |
|                | 4.315          |          | -11.9433335 | <b>0.0000</b> |
|                | 8.315          |          | -15.4550002 | 0.5240        |
|                | 12.315         |          | -16.8533346 | 0.9638        |
|                | 36.315         |          | -17.7083332 | 0.2303        |
|                | 48.315         |          | -16.7416690 | 0.9918        |
|                | <b>CG12267</b> | mRNA     | 0           | -7.4566667    |
| 0.25           |                |          | -7.1916666  | 0.9822        |
| 0.53           |                |          | -6.6366666  | 0.2932        |
| 4.315          |                |          | -7.4450001  | 1.0000        |
| 8.315          |                |          | -6.9816666  | 0.7843        |
| 12.315         |                |          | -6.9500000  | 0.7369        |
| 36.315         |                |          | -7.0916666  | 0.9188        |
| 48.315         |                |          | -7.5283333  | 1.0000        |
| pre-mRNA       |                |          | 0           | -15.3516682   |
|                |                | 0.25     | -11.1433333 | <b>0.0001</b> |
|                |                | 0.53     | -8.1049998  | <b>0.0000</b> |
|                |                | 4.315    | -8.8616665  | <b>0.0000</b> |
|                |                | 8.315    | -9.5366668  | <b>0.0000</b> |
|                |                | 12.315   | -10.0699998 | <b>0.0000</b> |
|                |                | 36.315   | -9.8750003  | <b>0.0000</b> |
|                |                | 48.315   | -11.4766660 | <b>0.0002</b> |
| <b>CG32187</b> |                | mRNA     | 0           | -16.8366663   |
|                | 0.25           |          | -16.9783335 | 0.9999        |
|                | 0.53           |          | -16.3133328 | 0.8981        |
|                | 4.315          |          | -13.4783311 | <b>0.0002</b> |
|                | 8.315          |          | -12.8400027 | <b>0.0001</b> |
|                | 12.315         |          | -15.5800008 | 0.1967        |
|                | 36.315         |          | -15.5066658 | 0.1585        |
|                | 48.315         |          | -16.1916670 | 0.7838        |
|                | pre-mRNA       |          | 0           | -16.2349999   |
|                |                | 0.25     | -15.3650017 | 0.4116        |
|                |                | 0.53     | -15.8116684 | 0.9310        |
|                |                | 4.315    | -13.7866662 | <b>0.0014</b> |
|                |                | 8.315    | -13.9674991 | <b>0.0068</b> |
|                |                | 12.315   | -16.0000006 | 0.9968        |
|                |                | 36.315   | -15.9383329 | 0.9879        |
|                |                | 48.315   | -16.6700025 | 0.9225        |

|               |              |          |             |               |
|---------------|--------------|----------|-------------|---------------|
| <i>CG5608</i> | mRNA         | 0        | -8.3016668  |               |
|               |              | 0.25     | -8.0700000  | 0.9986        |
|               |              | 0.53     | -7.6583333  | 0.7849        |
|               |              | 4.315    | -8.4150002  | 1.0000        |
|               |              | 8.315    | -7.4016666  | 0.4928        |
|               |              | 12.315   | -7.8383334  | 0.9388        |
|               |              | 36.315   | -7.0016667  | 0.1721        |
|               |              | 48.315   | -7.9349999  | 0.9802        |
|               |              | pre-mRNA | 0           | -14.3666667   |
|               | 0.25         |          | -9.8333336  | <b>0.0000</b> |
|               | 0.53         |          | -6.6416667  | <b>0.0000</b> |
|               | 4.315        |          | -7.9500001  | <b>0.0000</b> |
|               | 8.315        |          | -9.2449999  | <b>0.0000</b> |
|               | 12.315       |          | -11.7933334 | <b>0.0019</b> |
|               | <i>Hsp83</i> | mRNA     | 0           | -2.2916667    |
| 0.25          |              |          | -1.6900000  | 0.7346        |
| 0.53          |              |          | -1.3366667  | 0.3080        |
| 4.315         |              |          | 0.5733333   | <b>0.0002</b> |
| 8.315         |              |          | 0.2375000   | <b>0.0024</b> |
| 12.315        |              |          | -2.4100000  | 1.0000        |
| 36.315        |              |          | -1.4116667  | 0.3833        |
| 48.315        |              |          | -1.3033333  | 0.2782        |
| pre-mRNA      |              |          | 0           | -14.8999997   |
|               |              | 0.25     | -7.6866666  | <b>0.0000</b> |
|               |              | 0.53     | -6.5233334  | <b>0.0000</b> |
|               |              | 4.315    | -5.7883333  | <b>0.0000</b> |
|               |              | 8.315    | -7.0400001  | <b>0.0000</b> |
|               |              | 12.315   | -8.7466664  | <b>0.0000</b> |
| <i>aur</i>    |              | mRNA     | 0           | -4.3550000    |
|               | 0.25         |          | -3.8966667  | 0.9939        |
|               | 0.53         |          | -3.9383333  | 0.9965        |
|               | 4.315        |          | -5.2000000  | 0.8809        |
|               | 8.315        |          | -3.3883333  | 0.8069        |
|               | 12.315       |          | -3.7900000  | 0.9810        |
|               | 36.315       |          | -5.3866667  | 0.7621        |
|               | 48.315       |          | -3.9850000  | 0.9983        |
|               | pre-mRNA     |          | 0           | -17.2433333   |
|               |              | 0.25     | -9.8766670  | <b>0.0000</b> |
|               |              | 0.53     | -7.1400001  | <b>0.0000</b> |
|               |              | 4.315    | -7.9633332  | <b>0.0000</b> |
|               |              | 8.315    | -7.1616666  | <b>0.0000</b> |
|               |              | 12.315   | -8.1666669  | <b>0.0000</b> |
|               | <i>Gr85a</i> | mRNA     | 0           | -18.4216659   |
| 0.25          |              |          | -18.1483327 | 0.9992        |
| 0.53          |              |          | -18.4624992 | 1.0000        |
| 4.315         |              |          | -17.1700001 | 0.4185        |
| 8.315         |              |          | -16.7466676 | 0.1727        |
| 12.315        |              |          | -17.0500007 | 0.3321        |

---

|                 |        |             |               |
|-----------------|--------|-------------|---------------|
|                 | 36.315 | -18.2216673 | 0.9999        |
|                 | 48.315 | -17.7816679 | 0.9174        |
| <b>pre-mRNA</b> | 0      | -17.4133322 |               |
|                 | 0.25   | -12.1449989 | <b>0.0000</b> |
|                 | 0.53   | -11.9566662 | <b>0.0000</b> |
|                 | 4.315  | -12.3683326 | <b>0.0000</b> |
|                 | 8.315  | -13.8200010 | <b>0.0005</b> |
|                 | 12.315 | -15.0516677 | <b>0.0189</b> |
|                 | 36.315 | -15.2083341 | <b>0.0296</b> |
|                 | 48.315 | -15.5583342 | 0.0789        |

---
