# Supplementary material
Source: PubMed Central journal article supplement (PMC3813866)
Supplement: supp_113.156224_TableS9.pdf [file supp_113.156224_TableS9.pdf]

**Table S9 ANOVA results for model III fit with the constitutive exons as a covariate for 1,094 genes with constitutive exons and at least two alternative exons.** The main effects of constitutive exon, alternative exon, time-point and alternative exon-by-time-point interactions are shown. Results are based on type III SS, significance threshold <0.2.

| <b>FDR level</b> | <b>Constitutive exon</b> | <b>Alternative exons</b> | <b>Time-Point</b> | <b>Alternative exon-by-time-point interaction</b> |
|------------------|--------------------------|--------------------------|-------------------|---------------------------------------------------|
| <b>&lt;0.05</b>  | 1408                     | 1031                     | 29                | 56                                                |
| <b>&lt;0.1</b>   | 88                       | 12                       | 8                 | 20                                                |
| <b>&lt;0.2</b>   | 120                      | 8                        | 27                | 24                                                |
| <b>&gt;0.2</b>   | 295                      | 43                       | 1030              | 994                                               |
